# Supplementary material
Source: PubMed Central journal article supplement (PMC8647146)
Supplement: EMBR-22-e53200-s004.pdf [file EMBR-22-e53200-s004.pdf]

## Expanded View Figures

**Figure EV1. Daam2 is expressed in astrocytes, and Daam2 loss regulates morphology specifically with no difference in astrocyte number.**

- A Co-labeling of Daam2 (red) and mature astrocyte marker GFAP (green) with fluorescent *in situ* hybridization and immunostaining in OB (a) and cortex (b). Filled triangles indicate co-labeled cells. Scale bar: 50  $\mu\text{m}$ .
- B Immunostaining from Daam2<sup>LacZ/+</sup> animals indicates that Daam2 (LacZ<sup>+</sup>, Red) is not expressed in Nestin-positive (Green) neural progenitors. SVZ: subventricular zone, RMS: rostral migratory stream. Scale bar: 100  $\mu\text{m}$ .
- C–F Representative images (C) and quantification (D–F) of GLAST<sup>+</sup>, NFIA<sup>+</sup>, and BrdU<sup>+</sup> cells in Daam2 cHet and Daam2 cKO mice. Data are presented as mean  $\pm$  SEM. Student's *t*-test was used for statistical comparisons. *N* = 4–17 images from *N* = 3–5 mice. Scale bar: 100  $\mu\text{m}$ .
- G Representative images of astrocyte with Aldh1l1-GFP reporter in hippocampus and thalamus of Daam2 cHet and cKO mice at postnatal day 28. Scale bar: 50  $\mu\text{m}$ .

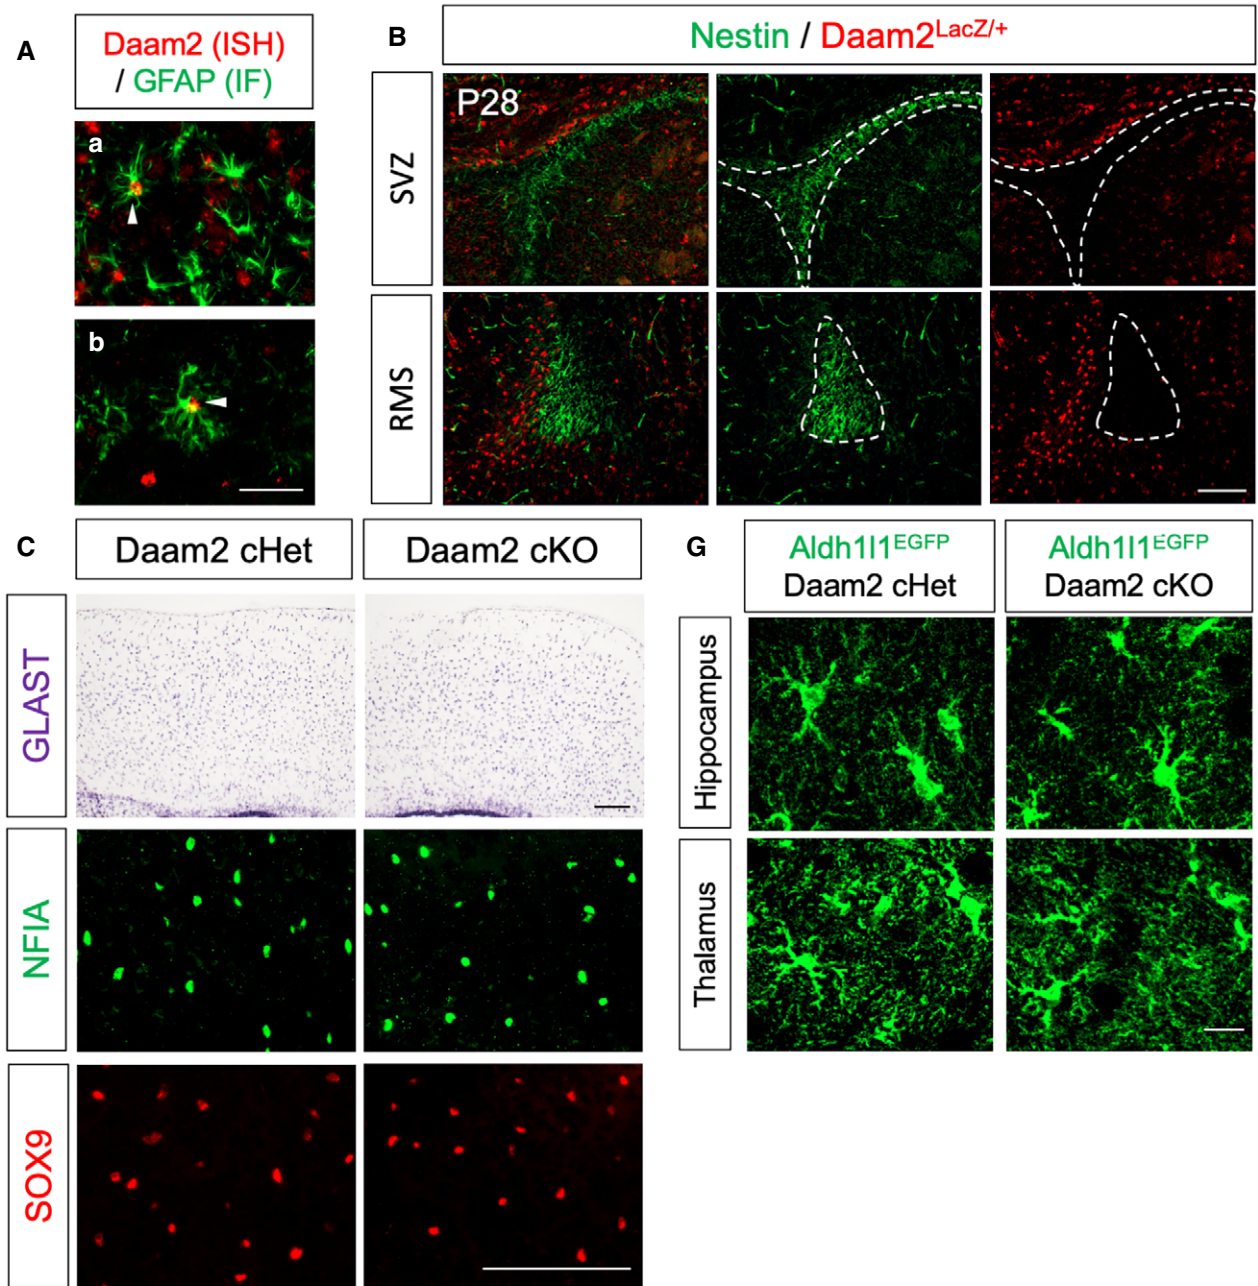

Figure EV1.

**Figure EV2. High-resolution imaging reveals significant morphological alterations of cortical astrocytes.**

- A Schematic of postnatal electroporation for labeling single astrocytes in cortex. Representative image of GFP-labeled astrocytes in cortical barrel with DAPI staining and immunostaining with pan-astrocyte marker, NFIA confirmed GFP-labeled cells as astrocytes.
- B Morphology of single cortical astrocytes was visualized and evaluated in each cortical layer using postnatal electroporation of a GFP transgene under control of astrocyte-specific GLAST promoter-driven pBase. Scale bar: 20  $\mu\text{m}$ .
- C, D Morphological alterations in single astrocytes of Daam2 cHet and cKO mice were assessed and quantified as in Fig 1H–K. Data are presented as mean  $\pm$  SEM. Total  $n = 13$ –14 cells from  $N = 5$  mice per genotype were used for analysis. Two-way ANOVA (C) and Student's  $t$ -test (D) are used for statistics. \* $P < 0.05$ , \*\* $P < 0.01$ .
- E, F Representative images (E) and quantification (F) of 3D volume analysis in astrocytes of Daam2 cHet and cKO mice. Scale bar: 20  $\mu\text{m}$ . (F) Data are presented as mean  $\pm$  SEM. Total  $n = 12$ –23 cells from  $N = 5$  mice per genotype were used for analysis. Two-way ANOVA is used for statistics. \* $P < 0.05$ , \*\*\*\* $P < 0.0001$ .

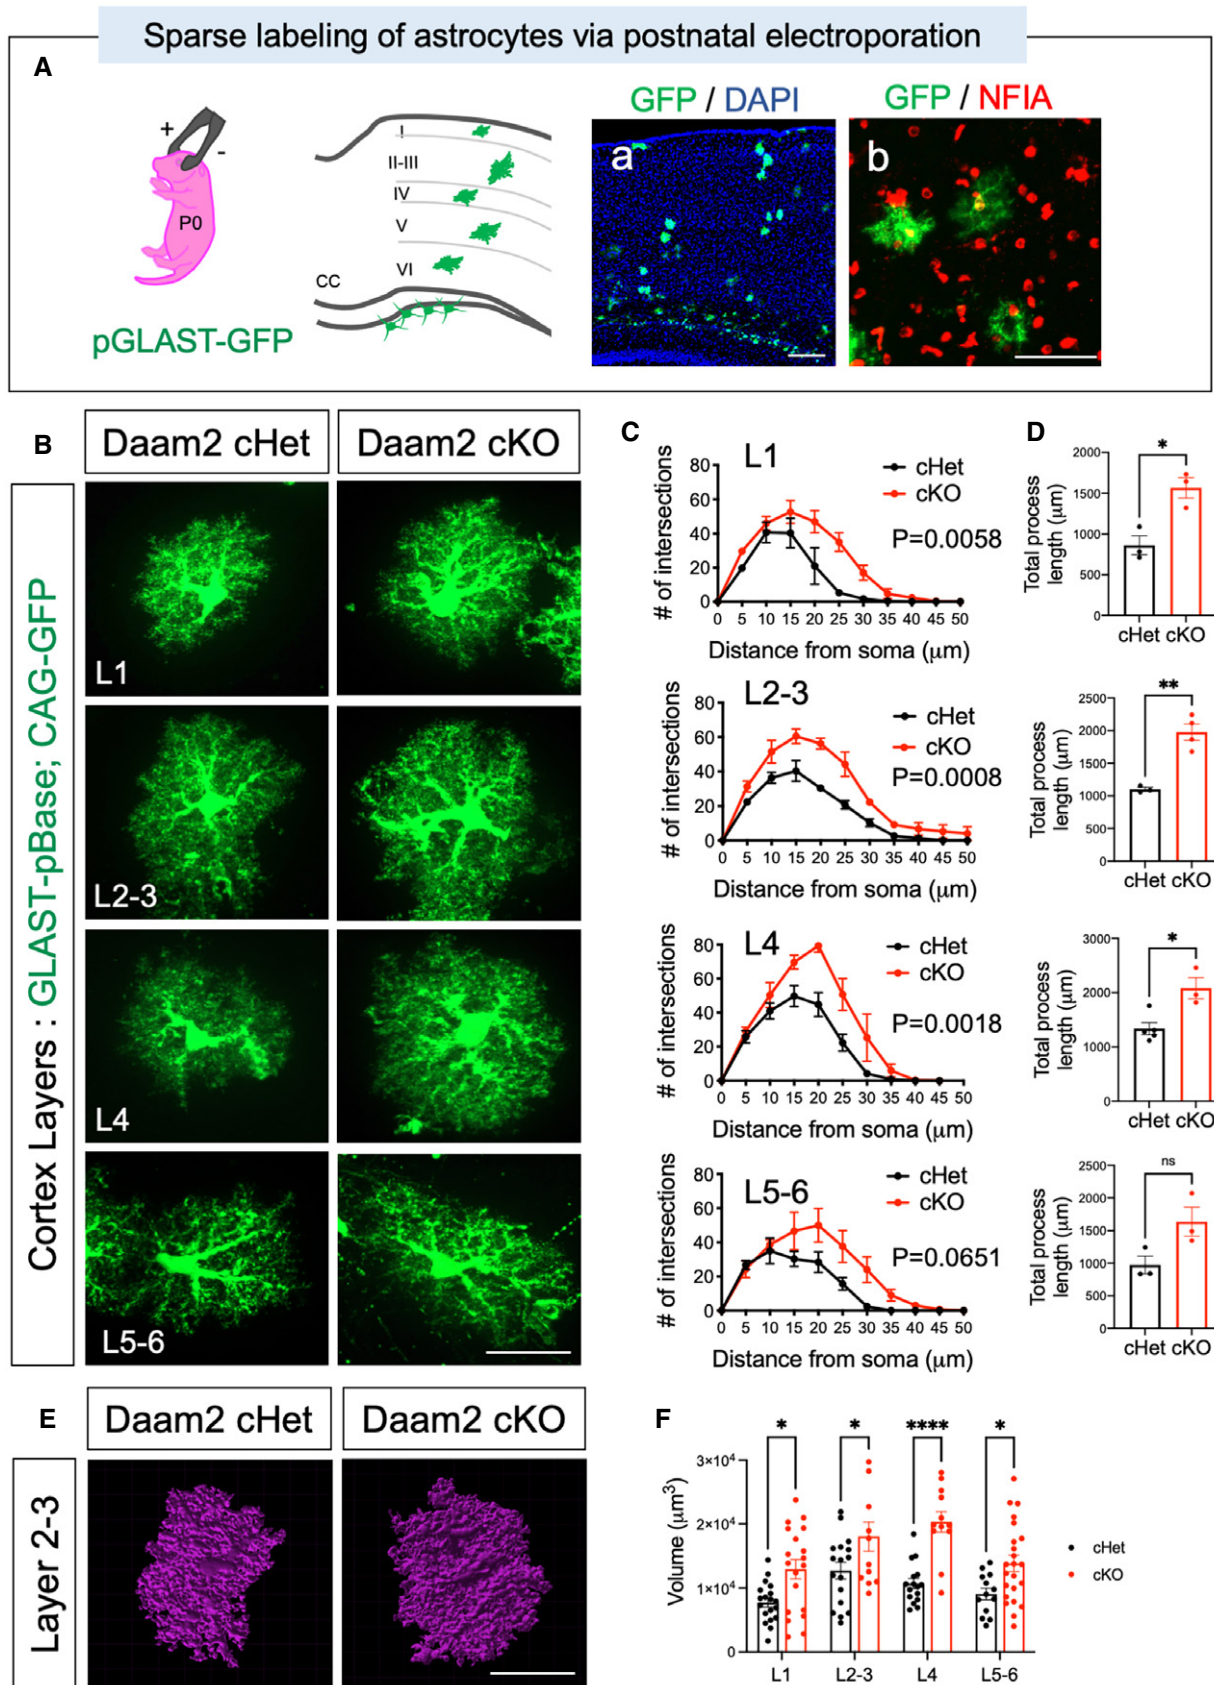

Figure EV2.

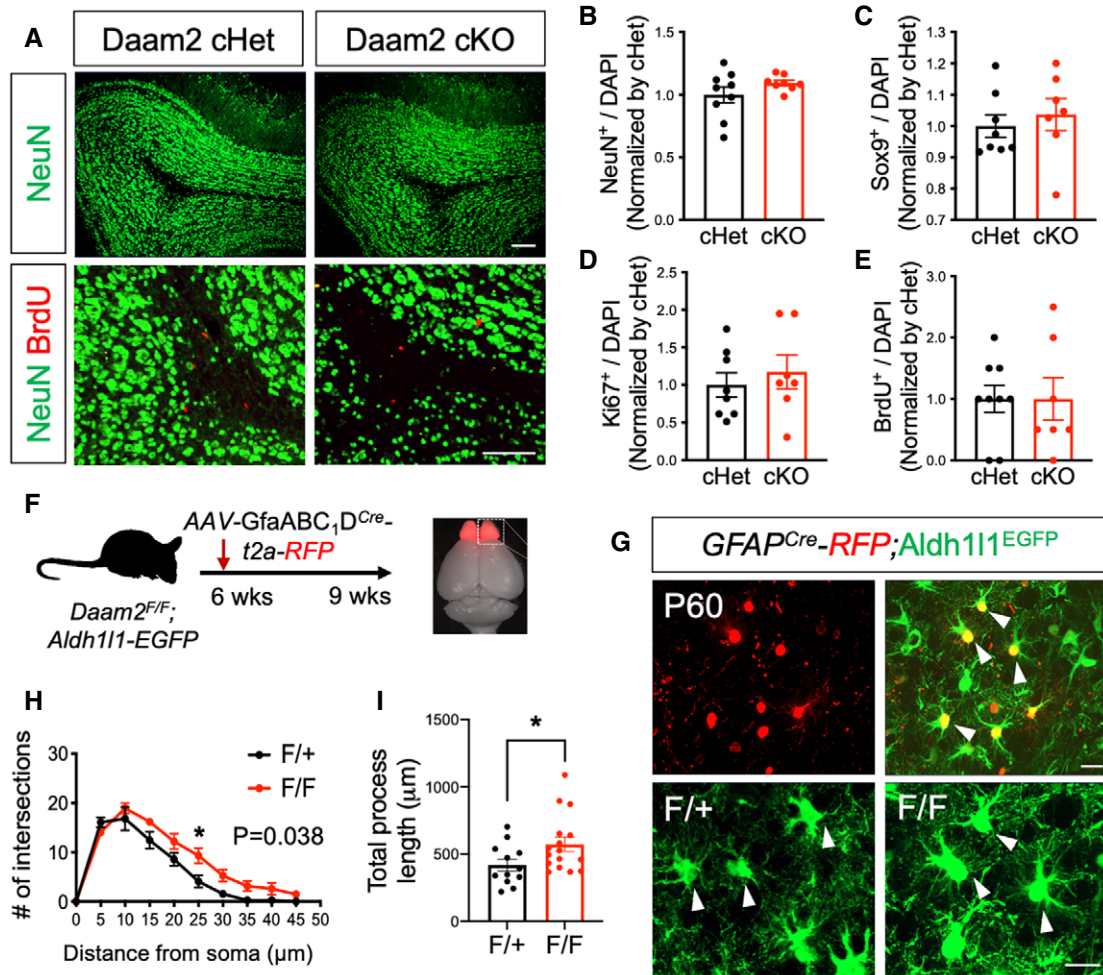

**Figure EV3. Temporal loss of Daam2 in adult OB exhibits increased morphological complexity without altering neurogenesis.**

**A** Representative images of NeuN and BrdU staining in OB of Daam2 cHet and cKO mice. Scale bar: 100 μm.

**B–E** No significant differences were found in numbers of NeuN<sup>+</sup>, Sox9<sup>+</sup>, BrdU<sup>+</sup>, and Ki67<sup>+</sup> cells in OB of Daam2 cHet and Daam2 cKO mice. Data are presented as mean ± SEM. Student's *t*-test was used for statistical comparisons. *n* = 7–9 images from *N* = 3 mice per each genotype.

**F** To visualize morphology of OB astrocytes after development, AAV-GfaABC<sub>1</sub>D-Cre-t2a-RFP was injected into 6-week-old Daam2<sup>F/+</sup> and Daam2<sup>F/F</sup> mice with Aldh111-EGFP reporter and analyzed three weeks later.

**G–I** Virus-infected, RFP-expressing, and Aldh111-EGFP co-labeled astrocytes (white triangles) were imaged and analyzed for their morphology as in Fig 1. Data are presented as mean ± SEM. *n* = 12, 16 cells, *N* = 3 mice per genotype. Two-way ANOVA (**H**) and Student's *t*-test (**I**) were used for statistical comparisons. \**P* < 0.05. Scale bar: 50 μm.

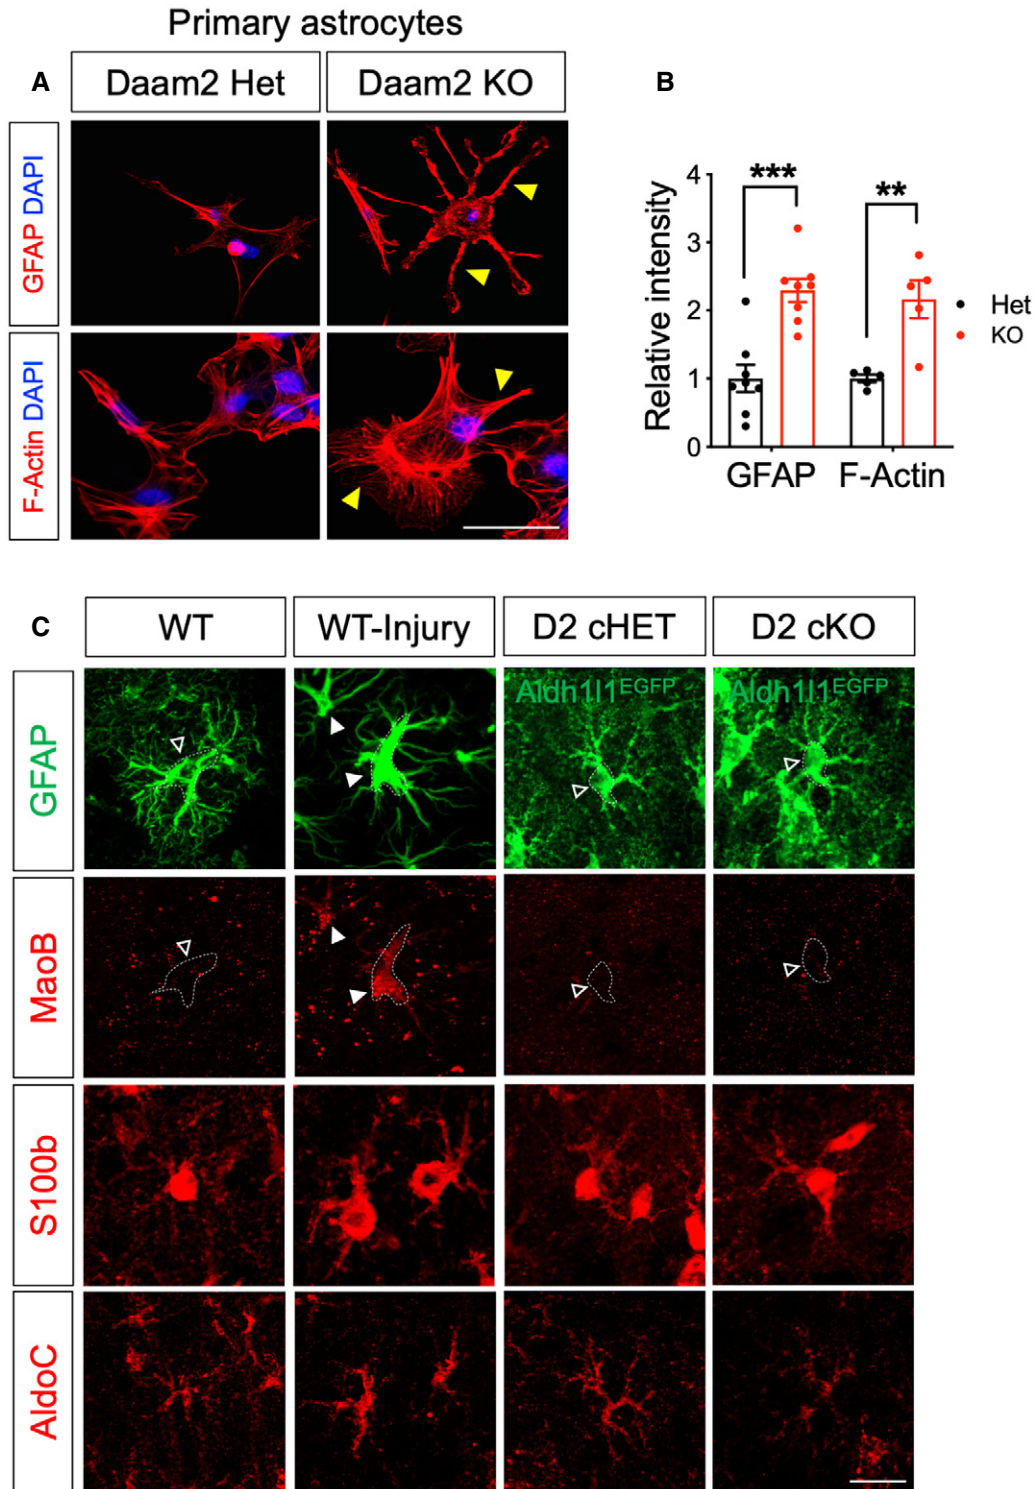

**Figure EV4. Daam2-deficient astrocytes display increased GFAP *in vitro* and normal level of MaoB, S100b, and AldoC expression *in vivo*.**

A, B Representative images and quantification of immunostaining of GFAP and F-actin in cultured primary astrocyte of Daam2 Het and KO mice. Yellow triangles indicate increased astrocytic processes in Daam2 KO astrocytes. Scale bar: 20  $\mu$ m. Experiments are repeated as triplicate, and data are presented as mean  $\pm$  SEM. Student's *t*-test was used, \*\**P* < 0.01, \*\*\**P* < 0.001.

C Representative images of immunostaining with reactive astrocyte markers. Photothrombotic stroke was induced in the ipsilateral cortex of wild-type mice and used as a positive control for reactive gliosis. Dotted outline indicates astrocyte cell body labeled with GFAP or Aldh1l1-EGFP. Filled triangles and empty triangles indicate increased expression and baseline level of expression or no changes in MaoB staining, respectively. Scale bar: 20  $\mu$ m.
